# Supplementary material
Source: publisher figshare collection journal article supplement (https://acs.figshare.com/ndownloader/files/23101874)
Supplement: Supplementary file 1 [file 23101874]

# Supporting Information

## Quenching of Singlet Oxygen by Carotenoids via Ultrafast Super-exchange Dynamics

Hiroyuki Tamura, Hiroshi Ishikita

Research Center for Advanced Science and Technology, The University of Tokyo, 4-6-

1 Komaba, Meguro-ku, Tokyo 153-8904 Japan

### Rotation of $\pi_g^*$ orbitals of O<sub>2</sub>

There is arbitrariness in the rotation of the degenerate  $\pi_g^*$  orbitals ( $\pi_y^*$  and  $\pi_z^*$ ) along the bond axis of isolated O<sub>2</sub>. The <sup>1</sup>O<sub>2</sub> (<sup>1</sup>Δ<sub>g</sub>) CASSCF wavefunction with 45-degree rotated  $\pi_g^*$  orbitals is equivalent to the <sup>1</sup>O<sub>2</sub> (<sup>1</sup>Δ<sub>g</sub>') wavefunction, and vice versa, as shown below.

The 45 and −45 degree rotated  $\pi_g^*$  orbitals are expressed with the original  $\pi_y^*$  and  $\pi_z^*$  orbitals as follows.

$$\pi_{45}^* = \frac{1}{\sqrt{2}}\pi_x^* + \frac{1}{\sqrt{2}}\pi_y^*, \quad \pi_{-45}^* = \frac{1}{\sqrt{2}}\pi_x^* - \frac{1}{\sqrt{2}}\pi_y^*$$

In the <sup>1</sup>Δ<sub>g</sub> configuration, either  $\pi_{45}^*$  or  $\pi_{-45}^*$  orbital is occupied by two electrons (electrons 1 and 2).

$$\begin{aligned} {}^1\Delta_g &= \frac{1}{\sqrt{2}}\pi_{45}^*(1)\pi_{45}^*(2) - \frac{1}{\sqrt{2}}\pi_{-45}^*(1)\pi_{-45}^*(2) \\ &= \frac{1}{\sqrt{2}}\left[\frac{1}{\sqrt{2}}\pi_x^*(1) + \frac{1}{\sqrt{2}}\pi_y^*(1)\right]\left[\frac{1}{\sqrt{2}}\pi_x^*(2) + \frac{1}{\sqrt{2}}\pi_y^*(2)\right] - \frac{1}{\sqrt{2}}\left[\frac{1}{\sqrt{2}}\pi_x^*(1) - \frac{1}{\sqrt{2}}\pi_y^*(1)\right]\left[\frac{1}{\sqrt{2}}\pi_x^*(2) - \frac{1}{\sqrt{2}}\pi_y^*(2)\right] \\ &= \frac{1}{\sqrt{2}}\left[\frac{1}{2}\pi_x^*(1)\pi_x^*(2) + \frac{1}{2}\pi_x^*(1)\pi_y^*(2) + \frac{1}{2}\pi_y^*(1)\pi_x^*(2) + \frac{1}{2}\pi_y^*(1)\pi_y^*(2)\right] \\ &\quad - \frac{1}{\sqrt{2}}\left[\frac{1}{2}\pi_x^*(1)\pi_x^*(2) - \frac{1}{2}\pi_x^*(1)\pi_y^*(2) - \frac{1}{2}\pi_y^*(1)\pi_x^*(2) + \frac{1}{2}\pi_y^*(1)\pi_y^*(2)\right] \\ &= \frac{1}{\sqrt{2}}\left[\pi_x^*(1)\pi_y^*(2) + \pi_y^*(1)\pi_x^*(2)\right] \end{aligned}$$

$\frac{1}{\sqrt{2}} \quad -\frac{1}{\sqrt{2}}$   
 $\uparrow\uparrow \text{---} \uparrow\uparrow$   
<sup>1</sup>O<sub>2</sub> (<sup>1</sup>Δ<sub>g</sub>)

$\frac{1}{\sqrt{2}} \quad \frac{1}{\sqrt{2}}$   
 $\uparrow \text{---} \uparrow \text{---} \uparrow \text{---} \uparrow$   
<sup>1</sup>O<sub>2</sub> (<sup>1</sup>Δ<sub>g</sub>')

The final expression corresponds to the <sup>1</sup>Δ<sub>g</sub>' configuration consisting of the original  $\pi_y^*$  and  $\pi_z^*$  orbitals, where the respective orbitals are occupied by one electron.
